# Supplementary material
Source: ML conference proceedings conference paper supplement (https://openreview.net/forum?id=UFW67uduJd)
Supplement: supplementary_material [file attachment]

## A Training details

We use ten memory items for our MEMTO model, corresponding to the number of clusters in our  $K$ -means clustering. We elaborate on our process for deciding the number of clusters in Appendix C.2. To determine anomalies, we set the threshold as the top- $p\%$  of the combined results of the anomaly scores from both the training and validation data, with specified values of  $p$  for each dataset outlined in Table 5, following [40]. We set  $\lambda$  in the objective function to 0.01, use Adam optimizer [15] with a learning rate of  $5e-5$ , and employ early stopping with the patience of 10 epochs against the validation loss during training. Our experiments are conducted using the Pytorch framework on four NVIDIA GTX 1080 Ti 12GB GPUs. Furthermore, during the execution of our experiment, we make partial references to the code of [40].

### A.1 Hyperparameter settings

Important hyperparameters of MEMTO were determined through grid search, while others were set to commonly used default values based on empirical observations. We performed a grid search to determine the values of each hyperparameter within the following range:

- $\lambda \in \{1e+0, 5e-1, 1e-1, 5e-2, 1e-2, 5e-3, 1e-3\}$
- $lr \in \{1e-4, 3e-4, 5e-4, 1e-5, 3e-5, 5e-5\}$
- $\tau \in \{0.1, 0.3, 0.5, 0.7, 0.9\}$
- $M \in \{5, 10, 15, 20, 25, 30, 35, 40, 45, 50, 55, 60, 65, 70, 75, 80, 85, 90, 95, 100\}$

, where  $lr$ ,  $\tau$ , and  $M$  denote the learning rate, the temperature in the softmax function, and the number of clusters, respectively. Since we set the centroids of clusters as memory items, the number of memory items and that of clusters are the same. We set the optimal hyperparameters as follows:  $\lambda$  as  $1e-2$ ,  $lr$  as  $5e-5$ ,  $\tau$  as 0.1, and  $M$  as 10. All experiments in this paper are conducted using the same hyperparameters regardless of the dataset.

### A.2 Dataset

Table 5: Details in five benchmarks. The number of samples in the training, validation, and test sets is represented in the columns labeled ‘Train,’ ‘Valid,’ and ‘Test,’ respectively. The ‘ $p\%$ ’ column indicates the anomaly ratio used in the experiment. The ‘Dim’ column shows the dimension size of the data for each dataset.

|      | Train   | Valid   | Test    | $p(\%)$ | Dim |
|------|---------|---------|---------|---------|-----|
| SMD  | 566,724 | 141,681 | 708,420 | 0.5     | 38  |
| MSL  | 46,653  | 11,664  | 73,729  | 1.0     | 55  |
| PSM  | 105,984 | 26,497  | 87,841  | 1.0     | 26  |
| SMAP | 108,146 | 27,037  | 427,617 | 1.0     | 25  |
| SWaT | 396,000 | 99,000  | 449,919 | 0.1     | 53  |

Table 5 shows the statistical details of datasets used in experiments. We obtained SWaT by submitting a request through [https://itrust.sutd.edu.sg/itrust-labs\\_datasets/](https://itrust.sutd.edu.sg/itrust-labs_datasets/).



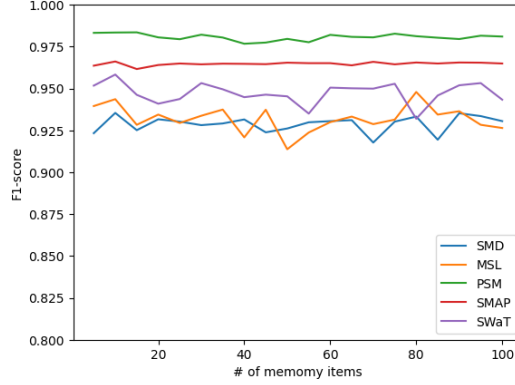

Figure 4: Number of memory items

the performance variance across datasets is small. Nevertheless, increasing the number of memory items raises the number of clusters needed for  $K$ -means clustering, thereby increasing computational complexity. Hence, we designate ten memory items as the default value after weighing performance and computational complexity.

Our study highlights the effectiveness of employing a restricted number of memory items to extract prototypical features of normal patterns in time series data. Unlike computer vision, which may require thousands of memory items [8], we demonstrate that only ten memory items were necessary for this task in the time series domain.

### C.3 Number of decoder layers

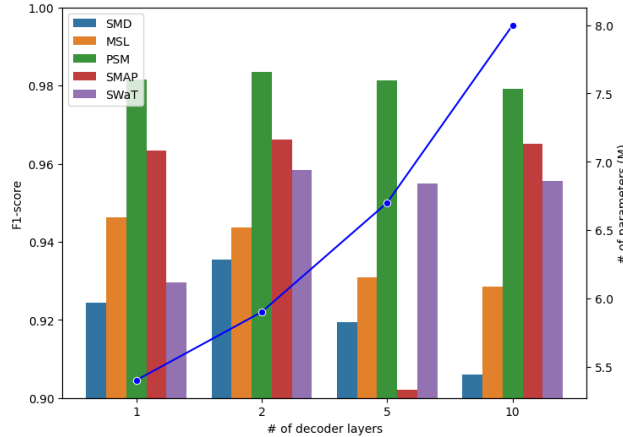

Figure 5: F1-score and number of parameters, according to the number of decoder layers. The right y-axis represents the values of the blue line graph in million units, while the left y-axis represents the values of the bar graph.

Figure 5 provides the performance of MEMTO under different numbers of decoder layers. As shown in Figure 5, a decoder that is too shallow (e.g., a decoder with a single layer) performs worse because it lacks sufficient capacity to reconstruct the input data accurately. On the other hand, if the decoder is too large (e.g., decoder with ten layers), it can become overly expressive and reconstruct even anomalies regardless of the encoding ability of the encoder. Therefore, it can lead to an over-generalization problem, which can ultimately decrease the performance of anomaly detection by reconstructing anomalies too accurately. Furthermore, a larger decoder layer with more parameters can increase computational and memory costs. We empirically find that considering the balance between performance and resource cost, a decoder with two layers is most suitable for anomaly detection tasks presented in our paper.

## 499 D Additional details for discussion

### 500 D.1 LSD values

Table 7: The mean LSD values corresponding to test data.

|             | SMD      |          | MSL      |          | PSM      |          | SMAP     |          | SWaT     |          |
|-------------|----------|----------|----------|----------|----------|----------|----------|----------|----------|----------|
|             | Normal   | Abnormal |
| MemAE       | 814.7836 | 842.2023 | 622.5195 | 640.4954 | 766.2473 | 782.1895 | 710.4929 | 706.3115 | 795.7227 | 770.9069 |
| MNAD        | 259.3633 | 258.0175 | 791.6371 | 788.2654 | 292.3340 | 293.4836 | 301.3480 | 301.2153 | 303.1933 | 310.9818 |
| <b>Ours</b> | 297.5692 | 330.1162 | 249.8632 | 263.4532 | 340.7552 | 363.7520 | 237.0070 | 234.7110 | 450.0926 | 721.3093 |

501 Table 7 shows mean LSD values of normal and abnormal samples across various domains of datasets  
502 while using different memory module mechanisms. In most datasets, our proposed Gated memory  
503 module consistently exhibits a lower mean LSD value for normal samples than for abnormal samples.  
504 Furthermore, the relative difference between these values is more significant than other memory  
505 module mechanisms. These results demonstrate the efficacy of our memory module mechanism in  
506 capturing prototypical features of normal patterns in data.

### 507 D.2 Anomaly score

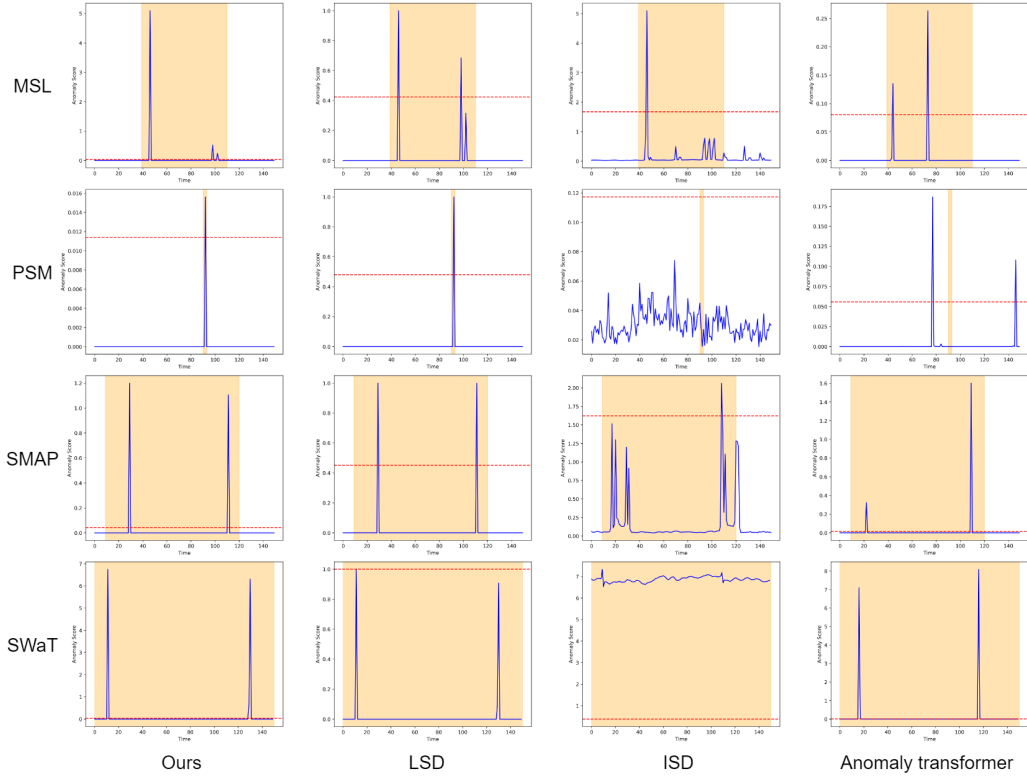

Figure 6: Visualization of anomaly scores for MSL, PSM, SMAP, and SWaT datasets.

508 Figure 6 visually represents the anomaly scores for benchmark datasets not discussed in Section 4.4  
509 We randomly sampled data of length 150 from MSL, PSM, SMAP, and SWaT test datasets and  
510 plotted the anomaly scores for each segment. Compared to other baselines, our proposed method  
511 consistently detects anomalies precisely with a low false positive rate from the perspective of the  
512 point adjustment method.
